# Supplementary material for: Ambient PM2.5 and PM10 Exposure and Respiratory Disease Hospitalization in Kandy, Sri Lanka
Source: MDPI journal article supplement (doi:10.3390/ijerph18189617), 2021-09-12
Supplement: s1 [file s1]

## Supplementary Materials

**Figure S1.** Kandy District, Sri Lanka (Land area 1910 km<sup>2</sup>; Population 1.5 million approx.).

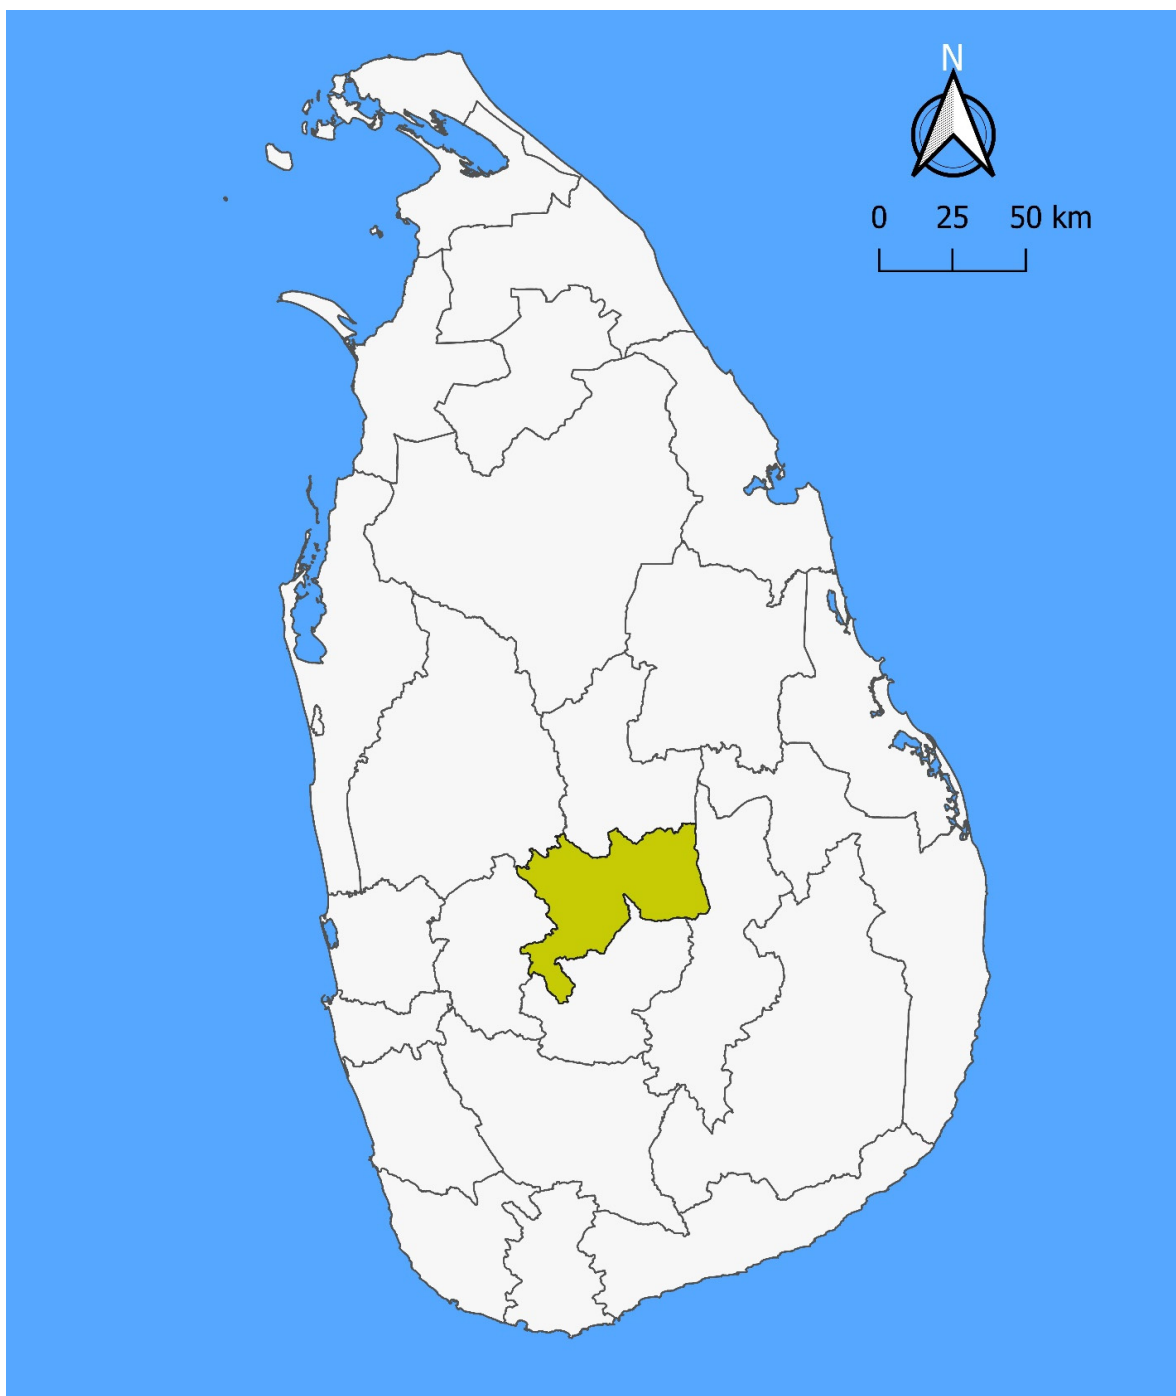

**Figure S2: Divisional secretariats of the Kandy District.** Catchment area of the Teaching Hospital, Kandy includes regions 0, 4-7, 9, 11-15 Catchment area of the Teaching Hospital, Peradeniya includes regions 1-4, 6, 10, 12-14, 16-18.

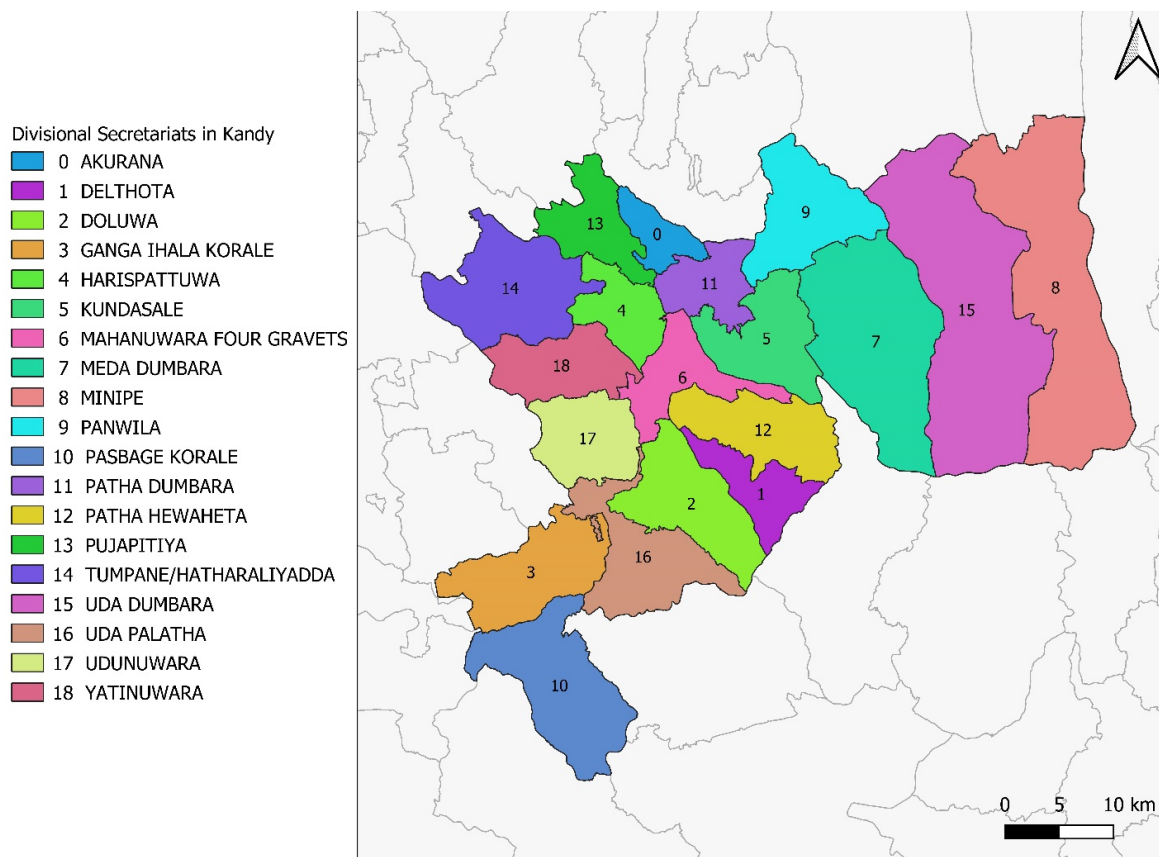

**Figure S3.** The locations of the air pollution monitoring sites in Kandy in 2020.

(KOALA 82 – National Institute of Fundamental Studies, KOALA 84 - Asgiriya, KOALA 87 - Faculty of Allied Health Sciences University of Peradeniya, KOALA 88 - Keerthi Sri Rajasinghe Mawatha)

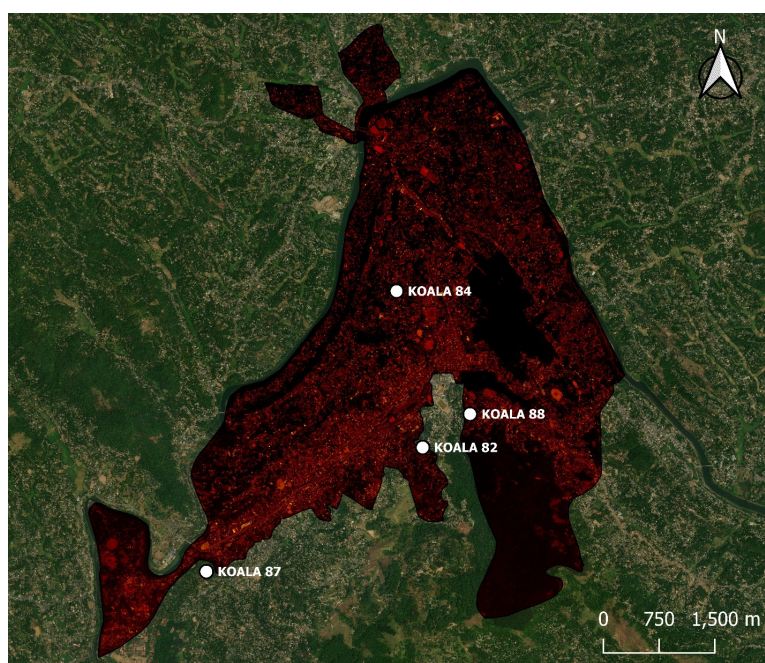

**Table S1:** The number of hospitalizations due to respiratory diseases from 01-01-2019 to 12-31-2019

|           | Number of hospitalization (%)<br>N=9709 |
|-----------|-----------------------------------------|
| Male      | 5221 (53.77)                            |
| Female    | 4488 (46.23)                            |
| ≤64 years | 6129 (63.13)                            |
| 65+ years | 3580 (36.87)                            |
| Pneumonia | 271 (2.79)                              |
| COPD      | 2238 (23.05)                            |
| Asthma    | 1988 (20.48)                            |

**Table S2:** The number of hospitalizations due to respiratory diseases in low and high air pollution periods in selected months

|            | Low ambient air pollution<br>period | High ambient air pollution<br>period |
|------------|-------------------------------------|--------------------------------------|
|            | Number of hospitalizations (%)      | Number of hospitalizations (%)       |
| All        | 2427 (45.17)                        | 2946 (54.83)                         |
| Male       | 1262 (23.49)                        | 1628 (30.30)                         |
| Female     | 1165 (21.68)                        | 1318 (24.53)                         |
| 0–64 years | 1586 (29.52)                        | 1846 (34.36)                         |
| 65+ years  | 841 (15.65)                         | 1100 (20.47)                         |
| Pneumonia  | 58 (1.08)                           | 90 (1.68)                            |
| COPD       | 525 (9.77)                          | 707 (13.16)                          |
| Asthma     | 534 (9.94)                          | 559 (10.40)                          |

**Table S3:** Descriptive statistics for daily air pollutants in Kandy, 2020 measured at different locations in Kandy.

| KOALA ID        | Time Period        | PM <sub>2.5</sub> | PM <sub>10</sub> |
|-----------------|--------------------|-------------------|------------------|
| KOALA82 (NIFS ) | Feb-01 to Mar-02   | 37.21 (9.73)      | 44.03 (11.59)    |
| KOALA84         | Feb-08 to Mar-29   | 40.27 (7.51)      | 45.39 (8.57)     |
| KOALA87         | Feb -11 to Mar -01 | 36.93 (9.97)      | 40.74 (11.31)    |
| KOALA88         | Feb -01 to Mar-01  | 37.59 (7.77)      | 42.99 (9.14)     |
